# Supplementary material for: *H migration-assisted MvK mechanism for efficient electrochemical NH3 synthesis over TM–TiNO
Source: Royal Society of Chemistry journal article supplement (doi:10.1039/d4cp01207k), 2024-01-01
Supplement: d4cp01207k1.pdf [file d4cp01207k1.pdf]

## Supplementary Information

### \*H migration-assisted MvK mechanism for efficient electrochemical NH<sub>3</sub> synthesis over TM-TiNO

Luyao Cui<sup>a</sup>, Zijun Sun<sup>d</sup>, Yawen Wang<sup>a</sup>, Xuan Jian<sup>c</sup>, Houfen Li<sup>b</sup>, Xiao Zhang<sup>b</sup>, Xiaoming Gao<sup>c</sup>,

Rui Li<sup>a,b,\*</sup>, Jianxin Liu<sup>a,\*\*</sup>

<sup>a</sup> *Key Laboratory of Coal Science and Technology Ministry of Education, College of Chemical Engineering and Technology, Taiyuan University of Technology, Taiyuan 030024, Shanxi, China*

<sup>b</sup> *Shanxi Key Laboratory of Compound Air Pollutions Identification and Control, College of Environmental Science and Engineering, Taiyuan University of Technology Taiyuan 030024, Shanxi, China*

<sup>c</sup> *College of Chemistry and Chemical Engineering, Shaanxi Key Laboratory of Chemical Reaction Engineering, Yan'an University, Yan'an 716000, Shaanxi, China*

<sup>d</sup> *Xi'an North Huian Chemical Industries Co. Ltd, Xi'an 710302, Shaanxi, China*

\*Corresponding authors.

*E-mail addresses: liujx0519@163.com (J. X. Liu), lirui13233699182@163.com (R. Li);*

For the construction of the RS-TiN<sub>1-x</sub>O<sub>x</sub> model, we use an alternative compositional approach by substituting O into the pristine RS-TiN unit cell, comprising 4 Ti and 4 N. Combining the high crystal symmetry, the octahedral face-centered cubic crystal system are obtained in Fig.S1a. When the value of x is 0.25, 0.50, and 0.75, the adjacent vacancies are filled alternatively with 3, 2, and 1 N, along with the corresponding substituted O. Moreover, TiN functions as a conductor, allowing the Ti\_3d electrons in the conduction band to transfer to the O atoms. This stabilizes the model without requiring external electron sources.

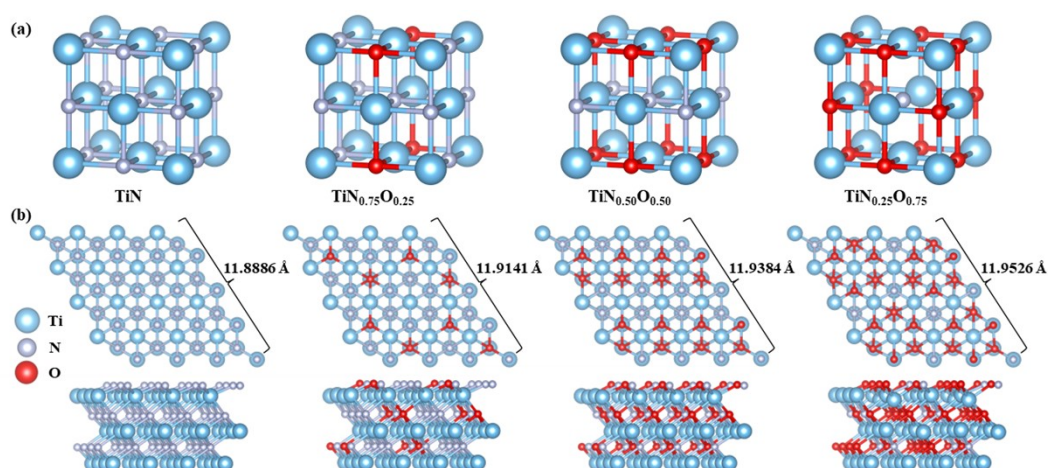

**Fig. S1.** (a) Unit cell crystal structures of non-stoichiometric RS-TiN<sub>1-x</sub>O<sub>x</sub>; (b) Side and top views of a 6 atomic layer slab configuration of TiN<sub>1-x</sub>O<sub>x</sub> (111)

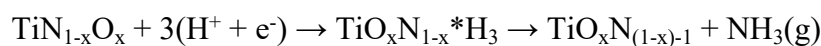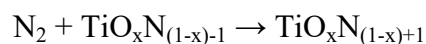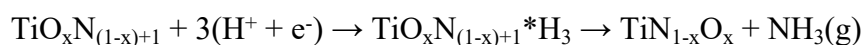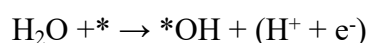

**Scheme S1.** The Mar-van Krevelen mechanism for ammonia synthesis on TiN<sub>1-x</sub>O<sub>x</sub>

| TM-TiNO | Magnetic moment ( $\mu\text{B}$ ) | TM-TiNO | Magnetic moment ( $\mu\text{B}$ ) |
|---------|-----------------------------------|---------|-----------------------------------|
| Fe-TiNO | 2.766                             | Co-TiNO | -0.350                            |
| Ni-TiNO | 0.760                             | Ru-TiNO | 0.038                             |
| Rh-TiNO | 0.307                             | Pd-TiNO | -0.080                            |
| Os-TiNO | 0.414                             | Ir-TiNO | 0.228                             |

**Table S1.** The ground state magnetic moment of the average TM atoms in TM-TiNO systems (in Bohr magnetons,  $\mu\text{B}$ )

|                                                   | Formation energy (eV) |                     |                      | Adsorption energy (eV) |                      |
|---------------------------------------------------|-----------------------|---------------------|----------------------|------------------------|----------------------|
|                                                   | $E_{\text{for-Nv}}$   | $E_{\text{for-Ov}}$ | $E_{\text{for-Tiv}}$ | $\text{N}_2$           | $\text{H}_2\text{O}$ |
| $\text{TiN}_{0.75}\text{O}_{0.25}$                | 2.020                 | 3.020               | 5.337                | -                      | -                    |
| $\text{TiN}_{0.50}\text{O}_{0.50}$                | 1.932                 | 2.832               | 2.936                | -                      | -                    |
| $\text{TiN}_{0.25}\text{O}_{0.75}$                | 1.535                 | 2.314               | 1.351                | -                      | -                    |
| $\text{TiNO}^{\text{s}}\text{N}_{\text{lattice}}$ | 1.387                 | 2.993               | 1.950                | -0.170                 | -0.211               |
| TiNO-Nv                                           | -                     | -                   | -                    | -1.219                 | -0.991               |
| Fe-TiNO                                           | 1.044                 | 3.004               | 2.110                | -1.406                 | -0.928               |
| Co-TiNO                                           | 1.151                 | 2.837               | 2.180                | -0.849                 | -0.843               |
| Ni-TiNO                                           | 0.811                 | 2.940               | 1.679                | -0.512                 | -0.727               |
| Ru-TiNO                                           | 1.087                 | 2.990               | 2.165                | -1.080                 | -0.909               |
| Rh-TiNO                                           | 1.062                 | 2.872               | 1.800                | -0.752                 | -0.719               |
| Pd-TiNO                                           | 1.065                 | 2.909               | 3.223                | -0.829                 | -0.495               |
| Os-TiNO                                           | 1.064                 | 3.017               | 2.087                | -1.668                 | -0.921               |
| Ir-TiNO                                           | 0.996                 | 2.891               | 1.847                | -1.471                 | -1.633               |

**Table S2.** The formation energy of surface Nv, Ov, and Tiv, and the adsorption energy of N<sub>2</sub> and H<sub>2</sub>O in TM-TiNO systems

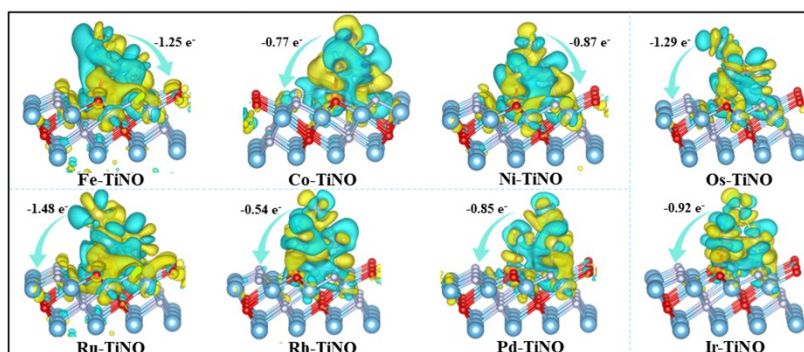

**Fig. S2.** The corresponding charge density difference (the isosurface is 0.001 e/Bohr<sup>3</sup>, cyan and yellow represent charge loss and accumulation, respectively)

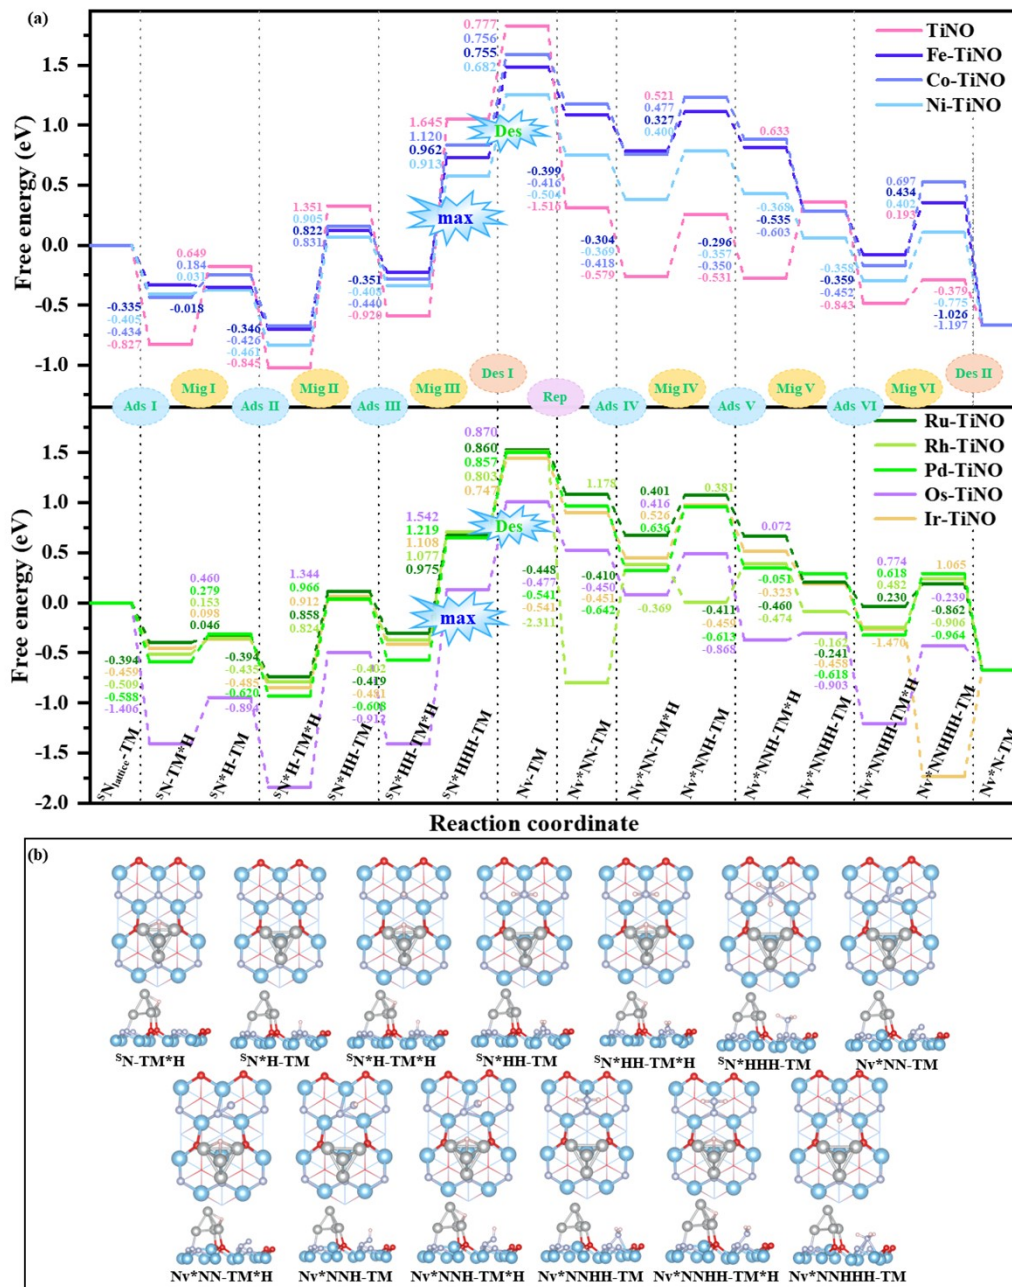

**Fig. S3.** (a) The  $\Delta G$  diagram for the ENRR via \*H migration-assisted MvK mechanism on TM-TiNO. (b) The corresponding structures for the ENRR via \*H migration-assisted MvK mechanism on TM-TiNO

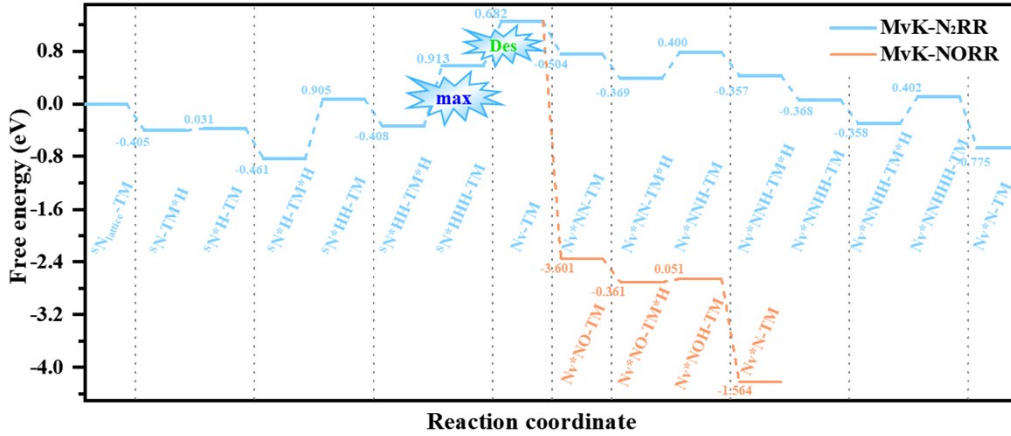

**Fig. S4.** The  $\Delta G$  diagram for the EN<sub>2</sub>RR and ENORR via \*H migration-assisted MvK mechanism on Ni-TiNO

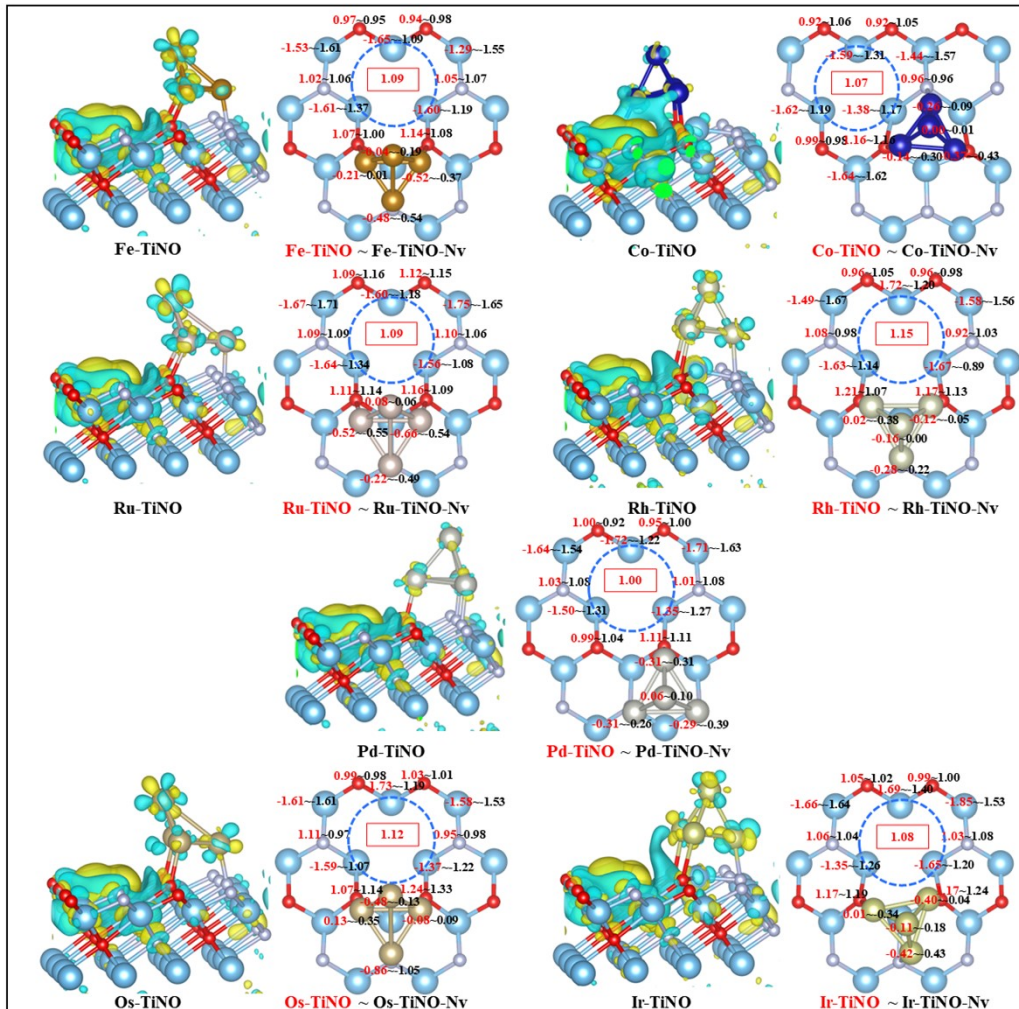

**Fig. S5.** The CDD at the  $^{\text{SN}}_{\text{lattice}}$  position of TM-TiNO (the isosurface is 0.001 e/Bohr<sup>3</sup>, and cyan and yellow represent charge loss and accumulation, respectively) and the

---

Bader charge of **TM-TiNO** ~ **TM-TiNO-Nv** (the values are shown in red ~ black,  
respectively)

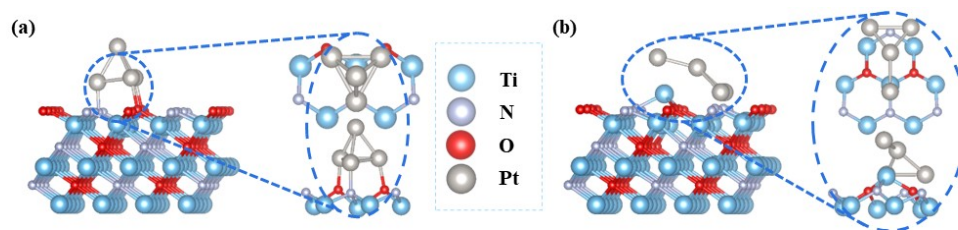

**Fig. S6.** (a) The initial and (b) optimized structure of Pt-TiNO
